1     Developing and evaluating a brief, socially primed video intervention to enable  
2             bystander cardiopulmonary resuscitation: A randomised control trial

3  
4     **Authors:**

5     \*Jean Skelton<sup>1, 2</sup>, Anne Templeton<sup>2</sup>, Jennifer Dang Guay<sup>2</sup>, Lisa MacInnes<sup>1</sup>, Gareth  
6     Clegg<sup>1, 3</sup>

7  
8     <sup>1</sup>Usher Institute, University of Edinburgh, Edinburgh, Scotland, UK

9     <sup>2</sup>School of Philosophy, Psychology, & Language Sciences, University of Edinburgh,  
10     Edinburgh, Scotland, UK

11     <sup>3</sup>Scottish Ambulance Service, Edinburgh, Scotland, UK

12  
13     **\*Corresponding Author:**

14     Jean Skelton

15     School of Philosophy, Psychology, and Language Sciences

16     7 George Square

17     The University of Edinburgh

18     Edinburgh EH8 9JZ

19     jean.skelton@ed.ac.uk

## 20 Abstract

21 Background: Over 30,000 people experience out-of-hospital cardiac arrest in the United  
22 Kingdom annually, with only 7-8% of patients surviving. One of the most effective methods of  
23 improving survival outcomes is prompt bystander intervention in the form of calling the  
24 emergency services and initiating chest compressions, also known as CPR. Additionally, the  
25 public must feel empowered to take action and use this knowledge in an emergency.

26

27 This study aimed to evaluate an ultra-brief CPR familiarisation video that uses empowering  
28 social priming language to frame CPR as a norm in Scotland.

29

30 Methods: In a randomised control trial, participants ( $n = 86$ ) were assigned to view either an  
31 ultra-brief CPR video intervention or a traditional long form CPR video intervention. Following  
32 completion of a pre-intervention questionnaire examining demographic variables and prior CPR  
33 knowledge, participants completed an emergency services-led resuscitation simulation in a  
34 portable simulation suite using a CPR manikin that measures resuscitation quality. Participants  
35 then completed questionnaires examining social identity and attitudes towards performing CPR.

36

37 Results: Aside from the CPR quality metrics of time carrying out CPR chest compressions  
38 (where the ultra-brief video condition scored higher scores) and average compressions per  
39 minute (where the long form video condition scored higher scores), there were no significant  
40 differences in CPR quality between the two conditions. Regarding the social identity measures,  
41 participants in the ultra-brief video condition scored higher on measures of “shared social  
42 identity with the video instructor” and “expected emergency support from other Scottish people”.  
43 There were no significant group differences in attitudes towards performing CPR.

44

45 Conclusions: Ultra-brief CPR video interventions hold promise as a method of equipping the  
46 public with basic resuscitation skills and empowering the viewer to intervene in an emergency.  
47 These interventions may be an effective avenue for equipping at-risk groups with resuscitation  
48 skills and for supplementing traditional resuscitation training courses.

## 49 Background

50 Each year over 30,000 people in the United Kingdom (UK) experience out-of-hospital  
51 cardiac arrest (OHCA), but only 7 - 8% of patients survive to hospital discharge (1,2).  
52 The most effective method for improving survival from OHCA is prompt bystander action  
53 in the form of cardiopulmonary resuscitation (CPR; 3,4), which has been shown to  
54 double or even triple OHCA survival outcomes (5). In order to facilitate bystander  
55 intervention, members of the public need to be equipped with CPR knowledge and feel  
56 empowered to use their CPR skills in an emergency (6).

57 Current methods of CPR training are generally long, information heavy, and delivered  
58 by perceived experts (7,8). They require a significant investment of time and attention  
59 and can give the impression that CPR is complicated and should be performed by  
60 skilled professionals (9,10). Furthermore, those most likely to be a bystander in an  
61 OHCA are often those not captured by traditional CPR training, such as people from  
62 areas of multiple deprivation and older people (11,12).

63 One approach to reducing these barriers to learning CPR is to use an 'ultra-brief video'  
64 (UBV) CPR intervention. A UBV CPR intervention is a short, shareable method of  
65 enabling the viewer to identify a cardiac arrest while equipping them with a fundamental  
66 knowledge of compression-only CPR. Participants exposed to CPR UBVs are more  
67 likely to attempt CPR, have higher quality CPR, and have higher self-reported  
68 confidence in their CPR abilities in comparison to untrained laypersons (10,13,14),  
69 emphasising the potential utility of this methodology in widening access to CPR  
70 familiarisation.

71  
72 While CPR knowledge is a key component to improving OHCA survival, it is not the only  
73 barrier to prompt bystander action (9). A survey conducted in Scotland found that only  
74 72% of trained individuals felt confident to use their CPR skills in an emergency (15).  
75 Similarly, a UK-wide survey of 4,000 participants found that only 51% of respondents  
76 felt confident to perform CPR in an OHCA (16). One potential approach to increasing  
77 willingness to perform bystander CPR is to emphasise the role of social identity in  
78 emergency contexts. Social identity refers to people's memberships of particular social  
79 groups, such as their occupation or nationality. These social groups have associated  
80 social norms, which dictate the rules and beliefs of what it means to be a part of that  
81 group. Social norms guide behaviour and can be pivotal for the provision of social  
82 support (17–19). For example, demonstrating that helping others is an integral part of a  
83 national group's identity has led to widespread helping behaviours at the country level  
84 (20). Notably, having a shared social identity (i.e., the perception that people feel part of  
85 the same group) is important in emergency contexts, as people are more likely to  
86 coordinate with others and trust their information when they feel part of the same group  
87 (21,22).

88  
89 In light of these findings, this study aimed to create and evaluate a maximally accessible  
90 UBV CPR intervention that frames CPR as a social norm in Scotland. In order to  
91 highlight CPR as a norm, collectivist language was primed in the script, using phrases  
92 such as "In Scotland, we look out for each other". These calculated language choices  
93 were designed to increase the salience of Scottish identity, empowering the viewer to

94 see bystander CPR as a norm in Scotland and, by extension, to use their CPR skills  
95 when needed.

96

97 While UBVs have been shown to facilitate better CPR quality than control conditions,  
98 less is known about their efficacy in comparison to traditional, long form CPR training  
99 videos (LFVs). In the current study, a randomised control trial was designed to compare  
100 the proposed UBV with the 2020 16-minute British Heart Foundation (BHF) 'Call Push  
101 Rescue' compression-only CPR familiarisation video (23). The Call Push Rescue video  
102 was chosen for this comparison as it is a commonly used online training tool in the UK.  
103 In addition to the video interventions, each condition included a practical CPR  
104 component to enable compression practice, an important quality predictor in CPR  
105 familiarisation (14). For the LFV condition, the BHF 'Call Push Rescue' video  
106 incorporates the use of a Laerdal Mini Anne manikin, therefore LFV participants used  
107 this manikin for the associated compression practice. As the UBV had no specific  
108 associated manikin type, Save a Life for Scotland (SALFS) CPR bags were used for  
109 compression practice as these bag manikins are freely available to the Scottish public,  
110 corresponding with the accessibility ethos of the UBV intervention (see Figure 1 for  
111 examples of each manikin).

112

113 **Fig 1. Materials used for compression practice.**

114 Left side: British Heart Foundation Call Push Rescue inflatable Mini Anne manikin. Right  
115 side: Save a Life for Scotland CPR bag. By filling the CPR bag with clothing or a pillow,  
116 the user can practice chest compressions.

117  
118 Participants then took part in a simulated OHCA scenario in which they performed  
119 bystander CPR on a Laerdal Little Anne Quality CPR (QCPR) manikin, which measures  
120 multiple CPR quality metrics using wireless sensors embedded in the manikin. In order  
121 to maximise ecological validity, the simulations included a mobile phone which  
122 connected to trained research staff acting as emergency services call handlers to guide  
123 the participants in the basics of bystander resuscitation, as is standard in real OHCA  
124 emergency services calls in the UK (24). Simulations were filmed using a multi-camera,  
125 portable Motorola simulation suite to generate further data on the accuracy and validity  
126 of the simulations.

127

128 *Study aims:*

129 1) Develop a compression-only CPR familiarisation intervention video which is  
130 short, shareable, and employs a social identity approach with the goal of  
131 maximising accessibility to CPR knowledge and increasing the likelihood of  
132 performing effective CPR.

133

134 2) Evaluate the effectiveness of this UBV in comparison to a longer-form, traditional  
135 CPR familiarisation video in relation to emergency services-led CPR quality.

136

137 3) Examine group differences between the UBV and LFV conditions with respect to  
138 social identity, shared social identity with Scottish people, expected support from

139 Scottish people, trust in the video instructor, and perceiving CPR as a social  
140 norm in Scotland.

141

142 4) Examine group differences between the UBV and LFV conditions in terms of  
143 willingness to perform CPR, confidence in ability to perform CPR, perceived  
144 barriers to CPR initiation, and understanding of the respective CPR  
145 familiarisation videos.

146

147 *Hypotheses:*

148 1) There will be no statistically significant differences between the UBV and LFV  
149 groups in terms of CPR quality metrics as measured by the QCPR manikin.

150

151 2) The UBV group will score higher than the LFV group on measures of social  
152 identity, indicating greater social identification with the UBV video instructor and  
153 other Scottish people.

154

155 3) There will be no statistically significant differences between the UBV and LFV  
156 groups on the variables of willingness to perform CPR, confidence in ability to  
157 perform CPR, perceived barriers to CPR initiation, and understanding of the  
158 respective CPR familiarisation videos.

159

160 *Primary outcome variable:*

161 1) CPR quality as measured by the QCPR manikin.



162 *Secondary outcome variables:*

- 163 1) Social identity as measured by the post-intervention questionnaire.
- 164 2) Attitudes towards the assigned video as measured by the post-intervention  
165 questionnaire.
- 166 3) Attitudes towards performing CPR as measured by the post-intervention  
167 questionnaire.

168 **Methods**

169 **Design:**

170 Two prior between-subjects experimental sub-studies were conducted to develop and  
171 test the socially primed UBV script. Further details on these studies can be found in the  
172 Supplementary Materials (S1 Appendix). Once the script was finalised, a test video was  
173 created. A parallel randomised control trial design with a one-to-one allocation ratio was  
174 employed. Participants were randomly assigned to one of two conditions: the refined 2-  
175 minute UBV, or a traditional, longer-form BHF CPR familiarisation video. A priori sample  
176 size calculation using G\*Power based on the large effect sizes observed in previous  
177 literature (10, 14) yielded a required sample size of 74 participants (80% power, alpha =  
178 0.05, two-sided test) to detect a significant difference in the primary outcome variable of  
179 CPR quality between groups.

180

181 **Participants:**

182 Participants ( $n = 86$ ) were recruited from staff and students at the University of  
183 Edinburgh. Descriptive statistics for the demographic variables are shown in Table 1.

184 Exclusion criteria were being under 18 years of age, being a healthcare professional,  
 185 being CPR trained in the last 18 months, and not being a staff member or student at the  
 186 University of Edinburgh. Four participants were excluded for not meeting these criteria,  
 187 resulting in a sample of 82 participants.

188  
 189

Table 1. Descriptive statistics for demographic variables in each condition.

| Variable                   | UBV (n = 41)       |      | LFV (n = 40)       |      |
|----------------------------|--------------------|------|--------------------|------|
|                            |                    | %    |                    | %    |
| <b>Age Range</b>           | 18-24              | 71   | 18-24              | 50   |
|                            | 25-34              | 22   | 25-34              | 30   |
|                            | 35-44              | 7    | 35-44              | 10   |
|                            |                    |      | 45-54              | 5    |
|                            |                    |      | 55-64              | 5    |
| <b>Gender</b>              | Female             | 63   | Female             | 57.5 |
|                            | Male               | 15   | Male               | 22.5 |
|                            | Non-binary         | 2    | Non-binary         | 2.5  |
|                            | Prefer not to say  | 20   | Prefer not to say  | 17.5 |
| <b>Region of Residence</b> | Scotland           | 83   | Scotland           | 85   |
|                            | Outside UK         | 5    | Outside UK         | 2.5  |
|                            | Not Disclosed      | 12   | Northern Ireland   | 2.5  |
|                            |                    |      | Not Disclosed      | 10   |
| <b>Employment</b>          | Employed full time | 9.8  | Employed full time | 22.5 |
|                            | Employed part time | 2.4  | Employed part time | 5    |
|                            | Student            | 85.4 | Student            | 70   |
|                            | Unemployed         | 2.4  | Unemployed         | 2.5  |

190 *A summary of the descriptive statistics for the demographic variables. Percentage of the total sample per*  
 191 *condition is displayed.*

192

193 In relation to the QCPR data specifically, eight participants were excluded due to  
 194 technical issues with the QCPR manikin or ending the simulation early due to exertion,  
 195 resulting in a final QCPR sample size of 75 participants (UBV n = 38, LFV n = 37).

196  
197 Regarding the pre-intervention questionnaire, complete data for 81 participants were  
198 collected (UBV  $n = 41$ , LFV  $n = 40$ ). A single participant's data was lost due to technical  
199 issues. For the post-intervention questionnaire, complete data were collected for all 82  
200 participants (UBV condition  $n = 42$ , LFV condition  $n = 40$ ). A flowchart of participant  
201 recruitment and exclusion can be seen in Figure 2.

202

203 **Fig 2. Study protocol.**

204 Flow chart detailing the recruitment and testing process of the randomised control trial.  
205

206 **Materials:**

207 Once written consent was obtained, participants completed a pre-intervention  
208 questionnaire, which included information about demographic characteristics and prior  
209 CPR knowledge, and a post-intervention questionnaire, which examined social identity,  
210 feedback on the assigned video intervention, and attitudes towards performing CPR.  
211 These measures were validated during the UBV video development (see S1 Appendix).  
212 The pre-intervention demographic variables were: age range, gender, region of  
213 residence, employment, and prior CPR knowledge. Participants also completed a  
214 screening measure at this time to ensure they met the inclusion criteria.

215

216 Regarding the CPR interventions, the BHF 'Call Push Rescue' video and associated  
217 Mini Anne manikin were used in the LFV condition, while the novel SALFS 2-minute  
218 CPR familiarisation video and SALFS bag manikin was used as the UBV intervention.  
219 QCPR metrics were recorded using the Laerdal QCPR App (Version 5.1.0; 25). The

220 following CPR quality metrics were examined: compression depth, which measures  
221 percentage time spent performing compressions at the correct depth; chest  
222 compression fraction (CCF), which measures percentage time where adequate  
223 compressions are occurring; release of compressions, which quantifies adequate  
224 release of a compression; total number of compressions; percentage of compressions  
225 between the optimum rate of 100 - 120 beats per minute (bpm); and average number of  
226 compressions per minute. An overall compression score and total composite CPR score  
227 were also examined, as calculated by a scoring algorithm developed by Laerdal  
228 Medical. See S2 Appendix for further information on the calculation and  
229 operationalisation of the Q CPR metrics. All simulations were filmed using Motorola  
230 Solutions VB400 cameras in a portable, multi-angle simulation suite. Motorola  
231 VideoManager software (Version 16.2; 26) was employed in order to gather feedback  
232 from Scottish Ambulance Service paramedics and call handlers on the quality and  
233 ecological validity of the simulations.

234  
235 The post-questionnaire variables examined in relation to social identity were: Scottish  
236 social identity, or the degree to which participants identify with Scottishness; shared  
237 Social identity with the video instructor, or the extent to which participants identified as  
238 being in the same social group as their video instructor; trust in the person providing  
239 instruction, which examined participant trust in the video instructor; perceived norm of  
240 helping, or the extent to which participants associated helping behaviours with  
241 Scottishness; and expected support, which examined expected levels of support from

242 Scottish people in an emergency. Social identity questionnaire items were scored on a  
243 Likert scale ranging from 1 (“Strongly Disagree”) to 5 (“Strongly Agree”).

244

245 With regard to attitudes towards the assigned video intervention, the post-intervention  
246 questionnaire captured participant views on the following variables: anxiety from the  
247 video instructions, which examined participants’ anxiety towards the video instructor;  
248 sufficiency of practical CPR information, or the extent to which participants felt their  
249 video furnished them with sufficient information; and clarity, which examined how clear  
250 the participants found their video. Regarding attitudes towards performing CPR, the  
251 post-intervention questionnaire examined confidence in performing CPR, which  
252 examined participants’ confidence in their CPR ability; willingness to perform CPR,  
253 which explored participant willingness to perform bystander CPR; and barriers to CPR  
254 performance, which explored participants’ perceived barriers to performing bystander  
255 CPR. Questionnaire items that explored attitudes towards performing CPR and the  
256 assigned video intervention were scored on a Likert scale ranging from 1 (“Strongly  
257 Disagree”) to 5 (“Strongly Agree”). All materials and data used are available on the  
258 Open Science Framework (27).

259

## 260 Procedure

261 Ethical approval was secured from the University of Edinburgh’s Medical Education  
262 Ethics Committee (Reference: 2022/02). Participants were randomised to their assigned  
263 condition prior to participation using an algorithm-based computer randomisation  
264 programme, “Research Randomizer” (28). The randomisation sequence was stored on

265 an encrypted file on OneDrive. Participants, but not research staff, were blinded to their  
266 condition. All allocation and recruitment was carried out by the lead research assistant  
267 from the 1<sup>st</sup> of July 2022 to the 28<sup>th</sup> of February 2023 in the Queen's Medical Research  
268 Institute, University of Edinburgh.

269  
270 On arrival, participants completed the pre-intervention questionnaire using a digital form  
271 on a study laptop. Participants then watched their assigned video and completed the  
272 associated compression practice before undergoing a two-minute simulation of an  
273 OHCA in the simulation suite. At the beginning of the simulation, participants were given  
274 a smart phone to call a preloaded emergency services contact. This call went to a  
275 research assistant trained in using the Medical Priority Dispatch System (MPDS), the  
276 emergency call handling system used for dispatching the emergency services in the UK  
277 and guiding bystanders through the fundamentals of CPR. Scottish Ambulance Service  
278 call handlers trained the research team in the proper use of this script and reviewed the  
279 simulation videos for quality control. During the simulation, participants were required to  
280 correctly identify a cardiac arrest, call the emergency services, and perform 2-minutes  
281 of emergency services-led bystander CPR on the QCPR manikin. After 2-minutes of  
282 bystander CPR, the research assistant terminated the simulation. Participants then  
283 completed the post-intervention questionnaire using a digital form on a study laptop. A  
284 detailed overview of the study protocol is available on the Open Science Framework  
285 (27).

286

287 Analysis:

288 Analyses were conducted using R version 4.2.2 (29) and R Studio version  
289 2023.03.1+446 (30). Shapiro-Wilk tests were used to assess normality of the data for  
290 each outcome variable, which were not normally distributed ( $p < 0.05$ ). Given the small  
291 sample size and the categorical nature of the demographic data, Fisher's Exact Test of  
292 Independence was used to examine significant inter-group differences in demographic  
293 variables. Wilcoxon-Mann-Whitney tests for independent samples were used to  
294 examine average differences between the UBV and LFV groups for the variables of  
295 prior CPR knowledge, QCPR metrics, social identity, attitudes towards the assigned  
296 video intervention, and attitudes towards performing CPR. Wilcoxon-Mann-Whitney  
297 tests for independent samples were reported using medians (*Mdn*), interquartile ranges  
298 (*IQR*), and standardised *Z*-scores, while effect sizes were reported as Cohen's *d*.

299 Results

300 There were no significant differences in demographic variables and prior CPR  
301 knowledge between the UBV and LFV conditions ( $p > 0.05$  for all).

302

303 For all QCPR metrics excluding CCF and average compressions per minute, there were  
304 no statistically significant differences found between groups ( $p > 0.05$ ). With regard to  
305 CCF percentage scores, the UBV group (*Mdn* = 98, *IQR* = 7.25) had a significantly  
306 higher score than the LFV group (*Mdn* = 89, *IQR* = 15), and a medium-to-large effect  
307 size was observed ( $d = 0.74$ ,  $Z = -2.79$ ,  $p < 0.005$ ). The LFV group had significantly  
308 higher average compressions per minute (*Mdn* = 117 bpm, *IQR* = 4 bpm) than the UBV

309 group ( $Mdn = 112$  bpm,  $IQR = 17.5$  bpm;  $Z = -3.17$ ,  $p < 0.002$ ) and a medium effect size  
 310 was observed ( $d = 0.44$ ). However, both of these compression rates fell within the  
 311 clinically recommended range of 100-120 compressions per minute (31). Feedback  
 312 from Scottish Ambulance Service paramedics and call handlers on the simulation video  
 313 data confirmed that the MPDS script was being used adequately and that the  
 314 simulations were being performed accurately. A summary of the QCPR performance  
 315 metrics for each group can be found in Table 2.

316

Table 2. Descriptive statistics for the QCPR metrics observed in each condition

| Variable                             | UBV (n = 38) |       | LFV (n = 37) |     |
|--------------------------------------|--------------|-------|--------------|-----|
|                                      | Median       | IQR   | Median       | IQR |
| CCF * (%)                            | 98           | 7.25  | 89           | 15  |
| Compression Depth (%)                | 86           | 76.25 | 96           | 37  |
| Release (%)                          | 100          | 3.5   | 100          | 1   |
| Overall Compression Score (%)        | 91           | 37.5  | 91           | 15  |
| Total Compressions                   | 214          | 54.75 | 202          | 37  |
| Compressions between 100-120 bpm (%) | 58           | 43    | 59           | 35  |
| Average Compressions per Minute *    | 112          | 17.5  | 117          | 4   |
| Total CPR Score (%)                  | 68           | 66.25 | 56           | 74  |

*A summary of the QCPR variables per condition. Medians and interquartile ranges (IQR) are presented.*

*Note: \* = statistically significant differences.*

317

318 Regarding the variables relevant to shared social identity, video intervention feedback,  
 319 and group attitudes towards performing CPR, none of the survey metrics aside from  
 320 shared social identity with the video instructor and expected support were found to have  
 321 statistically significant inter-group differences ( $p > 0.05$  for all). Participants in the UBV  
 322 condition had greater feelings of shared social identity with the CPR instructor ( $Mdn =$



323 12, *IQR* = 3.75) than the LFV group (*Mdn* = 11, *IQR* = 3;  $Z = -2.45$ ,  $p < 0.015$ ), with a  
324 medium effect size ( $d = 0.40$ ) observed. Similarly, participants in the UBV condition  
325 (*Median* = 9, *IQR* = 2) had greater feelings of expected support from Scottish people  
326 than the LFV group (*Median* = 8, *IQR* = 2,  $Z = -2.86$ ,  $p < 0.004$ ) with a large effect size  
327 ( $d = 0.88$ ) observed. Importantly, there were no significant group differences in terms of  
328 attitudes towards performing CPR or perceived clarity and understanding of the  
329 respective video instructions. A summary of the post-intervention survey metrics for  
330 each group can be found in Table 3.

331

332

Table 3. Descriptive statistics for the social identity and video feedback variables across conditions.

| Variable                                                  | UBV (n = 42) |      | LFV (n = 40) |      | Max. Possible Score |
|-----------------------------------------------------------|--------------|------|--------------|------|---------------------|
|                                                           | Median       | IQR  | Median       | IQR  |                     |
| <b>Scottish Social Identity</b>                           | 14           | 5    | 14           | 5.5  | 20                  |
| <b>Shared Social Identity with the Video Instructor *</b> | 12           | 3.75 | 11           | 3    | 15                  |
| <b>Trust in the Person Providing Instruction</b>          | 5            | 1    | 5            | 0    | 5                   |
| <b>Perceived Norm of Helping</b>                          | 4            | 1    | 4            | 1    | 5                   |
| <b>Expected Support *</b>                                 | 9            | 2    | 8            | 2    | 10                  |
| <b>Confidence in Performing CPR</b>                       | 12           | 3    | 12           | 2    | 15                  |
| <b>Willingness to Perform CPR</b>                         | 8            | 1    | 8.5          | 2    | 10                  |
| <b>Anxiety from the Video Instructions</b>                | 9            | 2    | 9            | 2    | 10                  |
| <b>Sufficiency of Practical CPR Information</b>           | 14           | 3    | 15           | 2    | 15                  |
| <b>Clarity</b>                                            | 15           | 1    | 15           | 2.25 | 15                  |
| <b>Barriers to CPR Performance</b>                        | 11           | 3.75 | 10.5         | 5.25 | 20                  |

*Summary of the social identity and video feedback variables. Medians, interquartile ranges (IQR), and maximum possible scores are presented. High scores indicate a stronger presence of the variable of interest.*

*Note: \* = statistically significant differences.*

333

## 334 Discussion

335 This study demonstrated that aside from the variables of CCF (where the UBV condition  
 336 demonstrated significantly higher scores) and average compressions per minute (where  
 337 the LFV condition had significantly higher scores, yet both condition's median scores fell  
 338 within the clinically acceptable range of 100-120 bpm), there were no significant  
 339 differences in CPR performance between participants who watched a 2-minute UBV  
 340 CPR intervention in conjunction with a SALFS bag manikin and those who watched a

341 16-minute LFV intervention with an incorporated Laerdal Mini Anne manikin. Most  
342 notably, there were no statistically significant differences between conditions on the  
343 overall CPR composite score. Regarding the social identity variables, participants in the  
344 UBV condition reported significantly higher levels of shared social identity with the CPR  
345 video instructor in comparison to the LFV group, as well as greater levels of expected  
346 support from other Scottish people in an emergency. There were no differences  
347 between conditions in relation to attitudes towards performing CPR. Both groups felt  
348 their respective videos provided sufficient CPR information and clarity of instruction, and  
349 there were no significant differences in perceived barriers to CPR and anxiety after  
350 watching the video instructions.

351  
352 Previous research has demonstrated the efficacy of UBVs as CPR interventions.  
353 Bobrow and colleagues (14) found that participants exposed to UBVs had significantly  
354 higher average compression rate and depth scores than an untrained control group.  
355 Similarly, Panchal and colleagues (10) found that participants who viewed a UBV were  
356 more likely to call for emergency services and faster to begin chest compressions than  
357 an untrained control group. While these studies demonstrate the utility of UBV CPR  
358 familiarisation in comparison to untrained laypersons, the current study expands upon  
359 these findings by evaluating the effectiveness of a UBV in comparison to a LFV  
360 intervention in the context of emergency services-led bystander CPR. By demonstrating  
361 no clinically significant differences between the UBV and LFV conditions (excluding the  
362 variable of CCF, in which the UBV condition scored higher than the LFV condition), this

363 study provides an empirical basis for the efficacy of UBVs in the context of CPR

364 familiarisation.

365

366 The findings of this study hold key implications for both CPR familiarisation and wider

367 public health training initiatives. UBV familiarisation could be a key method to equip

368 traditionally hard-to-reach groups (9,12) and those most at risk of witnessing a cardiac

369 arrest, who often find it difficult to access or engage with traditional methods of

370 instruction (12,15,32). Furthermore, UBV interventions could be used to supplement

371 traditional CPR training methods as a means of refreshing knowledge and enabling

372 easy sharing of CPR skills, for example on social media. This UBV is also unique in that

373 it considers the wider system of resuscitation - explaining CPR in a realistic context that

374 includes the emergency services call handler, the patient, and the bystander.

375

376 A strong body of research evidences the role of social identity processes in emergency

377 helping behaviours (19,21,22). Research conducted by Drury and colleagues found that

378 bystanders are more likely to provide support to and expect support from members of

379 their own social group in an emergency context (22,33). Similarly, past research has

380 found that framing helping behaviour as being intrinsic to particular social identities

381 resulted in increased helping and health-related behaviours in the associated social

382 group (17,20,34). The current study considered multiple avenues through which social

383 identity could be harnessed in the UBV to facilitate helping behaviours. These included

384 raising the salience of Scottish social identity (i.e., casting an actor with a Scottish

385 accent), while also framing the bystander, instructor, emergency services, and the

386 patient as being part of the same social group. The UBV script explicitly defined social  
387 norms associated with Scottish identity (i.e., including lines such as “in Scotland we look  
388 out for each other”). Participants who watched the UBV demonstrated significantly  
389 higher questionnaire scores in ‘expected support from other Scottish people’ and  
390 ‘shared social identity with the video instructor’ compared to the non-Scottish LFV.  
391 These findings hold key implications for the use of social identity priming in CPR training  
392 materials, as people have been shown to adhere to behaviours that they believe are  
393 expected of them (20,35,36). Furthermore, these results highlight the potential for using  
394 social identity priming as a means of facilitating bystander compliance with emergency  
395 instructions, as people are more likely to follow emergency instructions from those seen  
396 as part of their social group (21,37,38). This social identification with others in an  
397 emergency relates to collective agency, or working with others to overcome an obstacle,  
398 and a willingness to help others (38). These findings suggest that increasing the  
399 salience of national identity and presenting CPR as a social norm is possible in the  
400 context of even a UBV, and that social identity priming may be a potential mechanism  
401 for encouraging bystander CPR.

402  
403 This study also presented some novel methodological approaches for evaluating CPR  
404 interventions. The research team developed a portable simulation suite in collaboration  
405 with Motorola Solutions which enabled the running of simulations in a more naturalistic  
406 environment, as opposed to being in a stationary, clinical simulation suite. This  
407 maintained greater ecological validity and allowed richer data collection on CPR quality  
408 using multi-angle video recordings of the simulation, which enabled feedback from

409 Scottish Ambulance Service call handlers and paramedics on simulation accuracy.  
410 Fidelity was also maximised by including a trained emergency services call handler in  
411 the simulation, a component often omitted in OHCA simulation research. In the majority  
412 of OHCA cases, bystander resuscitation is facilitated by an emergency services call  
413 handler (39–41). The addition of a call handler in the current study enabled testing of  
414 the adequacy of UBV CPR familiarisation in the context of a real-world system of care.  
415  
416 Finally, there are key study limitations to be considered. This study took place during  
417 the COVID-19 lockdowns, with government restrictions making recruitment of larger  
418 samples drawn from outside the University of Edinburgh impossible. Future work could  
419 examine the efficacy of socially primed UBVs using a more representative sample. Also,  
420 this study did not examine decay of CPR performance quality over time (42). Future  
421 research could explore post-UBV CPR performance longitudinally to further probe its  
422 long-term efficacy and the need to refresh CPR knowledge.

## 423 Conclusions

424 To the best of the authors' knowledge, this study is the first to evaluate the effectiveness  
425 of a low-cost, shareable UBV CPR intervention in comparison to a traditional LFV  
426 intervention. Furthermore, it is the first study to employ a social identity approach to  
427 CPR UBV intervention development with the goal of increasing the likelihood of  
428 bystander CPR. These findings suggest that UBV interventions are a viable way to  
429 equip the public with basic CPR knowledge, and that priming the viewer with collectivist  
430 language increases the salience of a shared sense of social identity with the instructor  
431 and the level of expected support from others. This method of CPR knowledge

432 dissemination holds promise for maximising the shareability of CPR skills, and for  
433 potentially empowering bystander action through social identity priming.

434 Acknowledgements:

435 The authors would like to thank the following people for their invaluable assistance  
436 during the course of this project: Donald McPhail and Judith Richardson of the Scottish  
437 Ambulance Service; Eilish Murphy, James Nicholson, Dominika Skrocka, Susan  
438 Gardner, Diane Lac, David Souter, Brian Gilhooley, Elsbeth Dewhirst, Sara Illicic and  
439 Molly Brewster of the University of Edinburgh/NHS Lothian; and all the volunteers who  
440 took part.

441

442 Supplementary Appendices:

443 S1 Appendix. Summary of UBV script development and testing

444 S2 Appendix. Laerdal QCPR Metrics

## References

- 445
- 446 1. Perkins GD, Brace-McDonnell SJ. The UK Out of Hospital Cardiac Arrest Outcome  
447 (OHCAO) project. *BMJ Open*. 2015 Oct;5(10):e008736.
- 448 2. Perkins GD, Lockey AS, de Belder MA, Moore F, Weissberg P, Gray H. National initiatives  
449 to improve outcomes from out-of-hospital cardiac arrest in England. *Emerg Med J*. 2016  
450 Jul;33(7):448–51.
- 451 3. Scottish Out-of-Hospital Cardiac Arrest data linkage project: Initial results [Internet].  
452 Available from: [https://www.gov.scot/publications/initial-results-scottish-out-hospital-cardiac-](https://www.gov.scot/publications/initial-results-scottish-out-hospital-cardiac-arrest-data-linkage-project/pages/4/)  
453 [arrest-data-linkage-project/pages/4/](https://www.gov.scot/publications/initial-results-scottish-out-hospital-cardiac-arrest-data-linkage-project/pages/4/)
- 454 4. Bobrow BJ, Panczyk M, Subido C. Dispatch-assisted cardiopulmonary resuscitation: The  
455 anchor link in the chain of survival. *Curr Opin Crit Care*. 2012 Jun;18(3):228.
- 456 5. Sasson C, Rogers MAM, Dahl J, Kellermann AL. Predictors of Survival From Out-of-  
457 Hospital Cardiac Arrest. *Circ Cardiovasc Qual Outcomes*. 2010 Jan;3(1):63–81.
- 458 6. Out of hospital cardiac arrest: Strategy 2021 to 2026 [Internet]. [cited 2023 Mar 24].  
459 Available from: [http://www.gov.scot/publications/scotlands-out-hospital-cardiac-arrest-](http://www.gov.scot/publications/scotlands-out-hospital-cardiac-arrest-strategy-2021-2026/)  
460 [strategy-2021-2026/](http://www.gov.scot/publications/scotlands-out-hospital-cardiac-arrest-strategy-2021-2026/)
- 461 7. McGovern SK, Blewer AL, Murray A, Leary M, Abella BS, Merchant RM. Characterizing  
462 barriers to CPR training attainment using Twitter. *Resuscitation*. 2018 Jun 1;127:164–7.
- 463 8. Vaillancourt C, Kasaboski A, Charette M, Islam R, Osmond M, Wells GA, et al. Barriers and  
464 facilitators to CPR training and performing CPR in an older population most likely to witness  
465 cardiac arrest: A national survey. *Resuscitation*. 2013 Dec 1;84(12):1747–52.
- 466 9. Dobbie F, Angus K, Uny I, Duncan E, MacInnes L, Hasseld L, et al. Protocol for a  
467 systematic review to identify the barriers and facilitators to deliver bystander  
468 cardiopulmonary resuscitation (CPR) in disadvantaged communities. *Syst Rev*. 2018 Sep  
469 17;7(1):143.
- 470 10. Panchal AR, Meziab O, Stolz U, Anderson W, Bartlett M, Spaitte DW, et al. The impact of



- 471 ultra-brief chest compression-only CPR video training on responsiveness, compression rate,  
472 and hands-off time interval among bystanders in a shopping mall. *Resuscitation*. 2014 Sep  
473 1;85(9):1287–90.
- 474 11. Becker TK, Gul SS, Cohen SA, Maciel CB, Baron-Lee J, Murphy TW, et al. Public  
475 perception towards bystander cardiopulmonary resuscitation. *Emerg Med J*. 2019 Nov  
476 1;36(11):660–5.
- 477 12. Dobbie F, Uny I, Eadie D, Duncan E, Stead M, Bauld L, et al. Barriers to bystander CPR in  
478 deprived communities: Findings from a qualitative study. *PLOS ONE*. 2020 Jun  
479 10;15(6):e0233675.
- 480 13. Bobrow BJ, Vadeboncoeur TF, Spaite DW, Potts J, Denninghoff K, Chikani V, et al. Impact  
481 of brief or ultra-brief Hands-Only CPR video training on the confidence of lay citizens to  
482 perform CPR. *Resuscitation*. 2010 Dec 1;81(2):S96.
- 483 14. Bobrow BJ, Vadeboncoeur TF, Spaite DW, Potts J, Denninghoff K, Chikani V, et al. The  
484 Effectiveness of Ultrabrief and Brief Educational Videos for Training Lay Responders in  
485 Hands-Only Cardiopulmonary Resuscitation. *Circ Cardiovasc Qual Outcomes*. 2011  
486 Mar;4(2):220–6.
- 487 15. Dobbie F, MacKintosh AM, Bauld L. Exploring the knowledge, attitudes, and behaviour of  
488 the general public to responding to out-of-hospital cardiac arrest [Internet]. 2016 [cited 2023  
489 Jun 8]. Available from: [http://www.gov.scot/publications/exploring-knowledge-attitudes-  
490 behaviour-general-public-responding-out-hospital-cardiac-arrest/](http://www.gov.scot/publications/exploring-knowledge-attitudes-behaviour-general-public-responding-out-hospital-cardiac-arrest/)
- 491 16. British Heart Foundation. Only half of UK adults confident they could perform CPR on a  
492 loved one [Internet]. [cited 2023 Mar 29]. Available from: [https://www.bhf.org.uk/what-we-  
493 do/news-from-the-bhf/news-archive/2023/february/only-half-of-uk-adults-confident-they-  
494 could-perform-cpr-on-a-loved-one](https://www.bhf.org.uk/what-we-do/news-from-the-bhf/news-archive/2023/february/only-half-of-uk-adults-confident-they-could-perform-cpr-on-a-loved-one)
- 495 17. Haslam SA, Jetten J, Postmes T, Haslam C. Social Identity, Health and Well-Being: An  
496 Emerging Agenda for Applied Psychology. *Appl Psychol*. 2009 Jan;58(1):1–23.

- 497 18. Neville FG, Templeton A, Smith JR, Louis WR. Social norms, social identities and the  
498 COVID-19 pandemic: Theory and recommendations. *Soc Personal Psychol Compass*.  
499 2021;15(5):e12596.
- 500 19. Levine M, Prosser A, Evans D, Reicher S. Identity and Emergency Intervention: How Social  
501 Group Membership and Inclusiveness of Group Boundaries Shape Helping Behavior. *Pers*  
502 *Soc Psychol Bull*. 2005 May 1;31:443–53.
- 503 20. Reicher S, Cassidy C, Wolpert I, Hopkins N, Levine M. Saving Bulgaria's Jews: An analysis  
504 of social identity and the mobilisation of social solidarity. *Eur J Soc Psychol*. 2006;36(1):49–  
505 72.
- 506 21. Carter HE, Drury J, Rubin GJ, Williams R, Amlôt R. Emergency responders' experiences of  
507 and expectations regarding decontamination. *Int J Emerg Serv*. 2014;3(2):179–92.
- 508 22. Templeton A, Nash C, Lewis L, Gwynne S, Spearpoint M. Information sharing and support  
509 among residents in response to fire incidents in high-rise residential buildings. *Int J Disaster*  
510 *Risk Reduct*. 2023 Jun 15;92:103713.
- 511 23. British Heart Foundation. Call Push Rescue - Learn CPR safely during the Coronavirus  
512 pandemic [Internet]. 2020 [cited 2023 May 2]. Available from:  
513 <https://www.youtube.com/watch?v=ROEyvmZDStI>
- 514 24. Clegg GR, Lyon RM, James S, Branigan HP, Bard EG, Egan GJ. Dispatch-assisted CPR:  
515 Where are the hold-ups during calls to emergency dispatchers? A preliminary analysis of  
516 caller–dispatcher interactions during out-of-hospital cardiac arrest using a novel call  
517 transcription technique. *Resuscitation*. 2014 Jan 1;85(1):49–52.
- 518 25. Laerdal Medical. QCPR App. 2022 Jul; [https://laerdal.com/us/products/simulation-](https://laerdal.com/us/products/simulation-training/resuscitation-training/qcpr-app/)  
519 [training/resuscitation-training/qcpr-app/](https://laerdal.com/us/products/simulation-training/resuscitation-training/qcpr-app/)
- 520 26. Motorola Solutions. VideoManager. 2022 May;  
521 [https://www.motorolasolutions.com/en\\_xu/video-security-access-](https://www.motorolasolutions.com/en_xu/video-security-access-control/videomanager/downloads.html)  
522 [control/videomanager/downloads.html](https://www.motorolasolutions.com/en_xu/video-security-access-control/videomanager/downloads.html)

- 523 27. Skelton J, Guay JD, Templeton A, MacInnes L, Clegg G. Developing and evaluating a brief,  
524 socially-primed video intervention to enable bystander cardiopulmonary resuscitation: A  
525 randomised trial. 2023 Jun 21 [cited 2024 Jan 3]; Available from:  
526 [https://osf.io/feh54/?view\\_only=3dc9b6f366044aa19bd165d40b0b7b0e](https://osf.io/feh54/?view_only=3dc9b6f366044aa19bd165d40b0b7b0e)
- 527 28. Research Randomizer [Internet]. [cited 2023 May 2]. Available from: <https://randomizer.org/>
- 528 29. R Core Team. R: A Language and Environment for Statistical Computing. Vienna, Austria;  
529 2022. Available from: <https://www.R-project.org/>
- 530 30. R Studio Team. Rstudio: Integrated Development for R. Rstudio, Inc. Boston, MA; 2022.  
531 Available from: <https://posit.co/download/rstudio-desktop/>
- 532 31. Perkins GD, Handley AJ, Koster RW, Castrén M, Smyth MA, Olasveengen T, et al.  
533 European Resuscitation Council Guidelines for Resuscitation 2015: Section 2. Adult basic  
534 life support and automated external defibrillation. Resuscitation. 2015 Oct 1;95:81–99.
- 535 32. Del Rios M, Han J, Cano A, Ramirez V, Morales G, Campbell TL, et al. Pay It Forward: High  
536 School Video-based Instruction Can Disseminate CPR Knowledge in Priority  
537 Neighborhoods. West J Emerg Med. 2018 Mar;19(2):423–9.
- 538 33. Drury J, Brown R, González R, Miranda D. Emergent social identity and observing social  
539 support predict social support provided by survivors in a disaster: Solidarity in the 2010  
540 Chile earthquake. Eur J Soc Psychol. 2016;46(2):209–23.
- 541 34. Frank LB, Chatterjee JS, Chaudhuri ST, Lapsansky C, Bhanot A, Murphy ST. Conversation  
542 and Compliance: Role of Interpersonal Discussion and Social Norms in Public  
543 Communication Campaigns. J Health Commun. 2012 Oct 1;17(9):1050–67.
- 544 35. Levine M, Manning R. Social identity, group processes, and helping in emergencies. Eur  
545 Rev Soc Psychol. 2013 Dec 1;24(1):225–51.
- 546 36. Bicchieri C, Chavez A. Behaving as expected: Public information and fairness norms. J  
547 Behav Decis Mak. 2010;23(2):161–78.
- 548 37. Drury J, Carter H, Cocking C, Ntontis E, Tekin Guven S, Amlôt R. Facilitating Collective

- 549 Psychosocial Resilience in the Public in Emergencies: Twelve Recommendations Based on  
550 the Social Identity Approach. *Front Public Health* [Internet]. 2019 [cited 2023 Jun 9];7.  
551 Available from: <https://www.frontiersin.org/articles/10.3389/fpubh.2019.00141>
- 552 38. Carter H, Drury J, Rubin GJ, Williams R, Amlôt R. Applying Crowd Psychology to Develop  
553 Recommendations for the Management of Mass Decontamination. *Health Secur.* 2015 Feb  
554 1;13(1):45–53.
- 555 39. Tanaka Y, Taniguchi J, Wato Y, Yoshida Y, Inaba H. The continuous quality improvement  
556 project for telephone-assisted instruction of cardiopulmonary resuscitation increased the  
557 incidence of bystander CPR and improved the outcomes of out-of-hospital cardiac arrests.  
558 *Resuscitation.* 2012 Oct 1;83(10):1235–41.
- 559 40. Kim MW, Kim TH, Song KJ, Shin SD, Kim CH, Lee EJ, et al. Comparison between  
560 dispatcher-assisted bystander CPR and self-led bystander CPR in out-of-hospital cardiac  
561 arrest (OHCA). *Resuscitation.* 2021 Jan 1;158:64–70.
- 562 41. Maier M, Luger M, Baubin M. Telephone-assisted CPR. *Notf Rettungsmedizin.*  
563 2016;19(6):468–72.
- 564 42. Woollard M, Whitfield R, Newcombe RG, Colquhoun M, Vetter N, Chamberlain D. Optimal  
565 refresher training intervals for AED and CPR skills: A randomised controlled trial.  
566 *Resuscitation.* 2006 Nov 1;71(2):237–47.

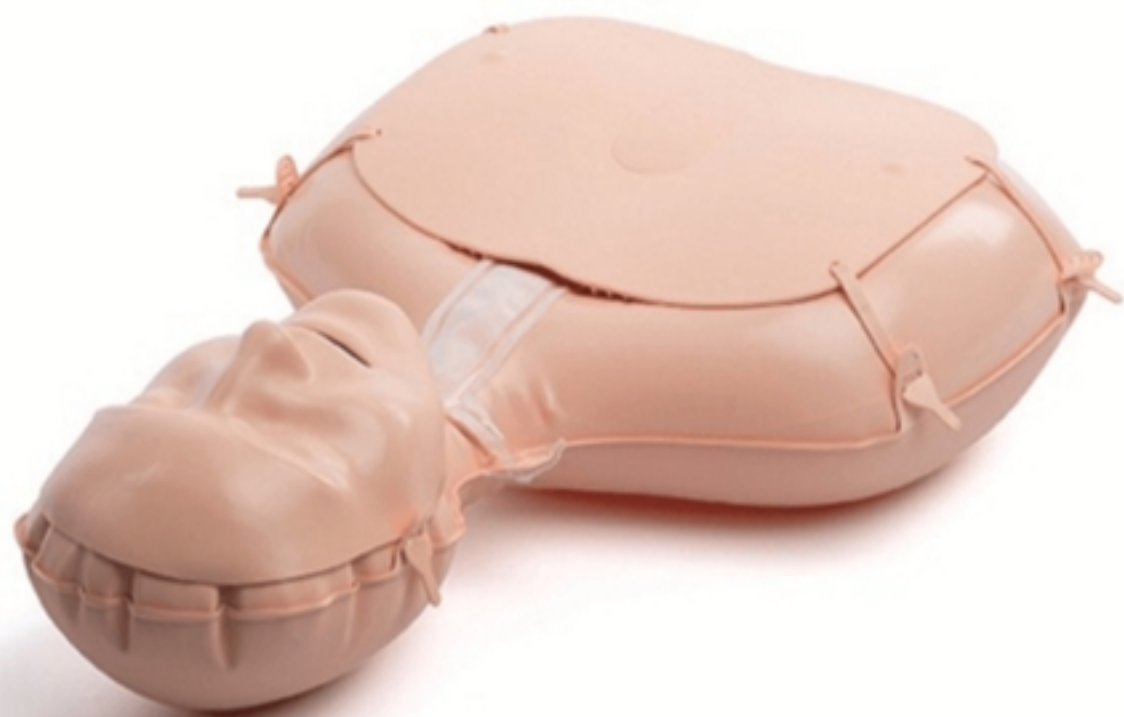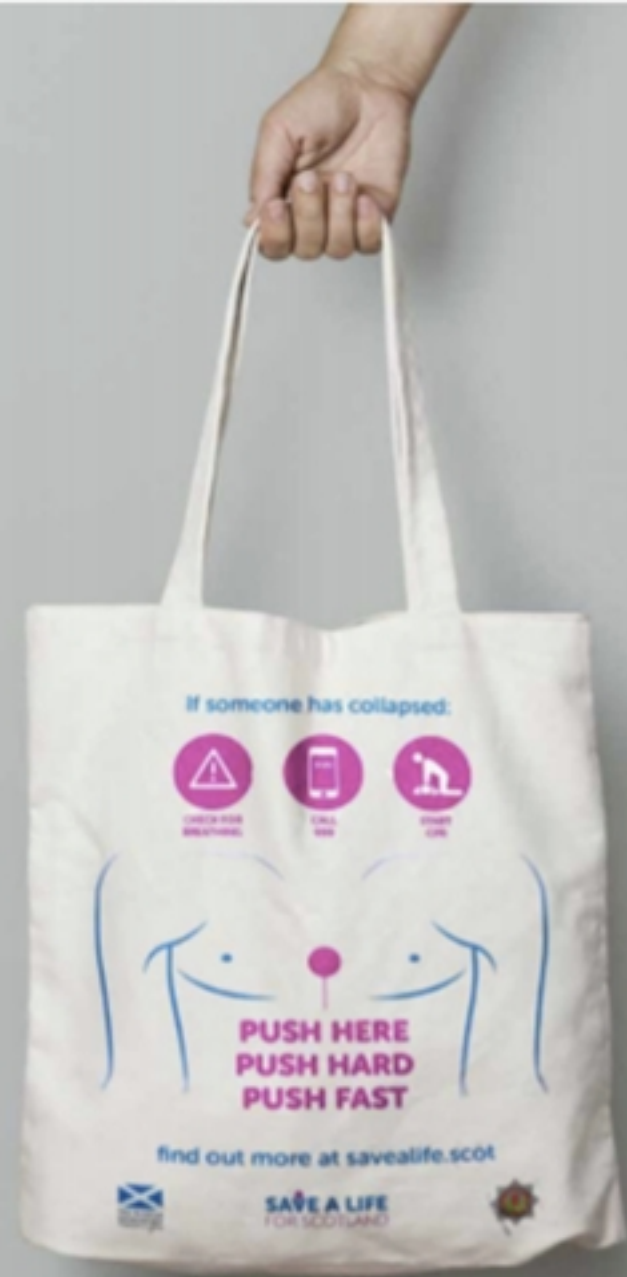

Figure 1

# Brief CPR video testing

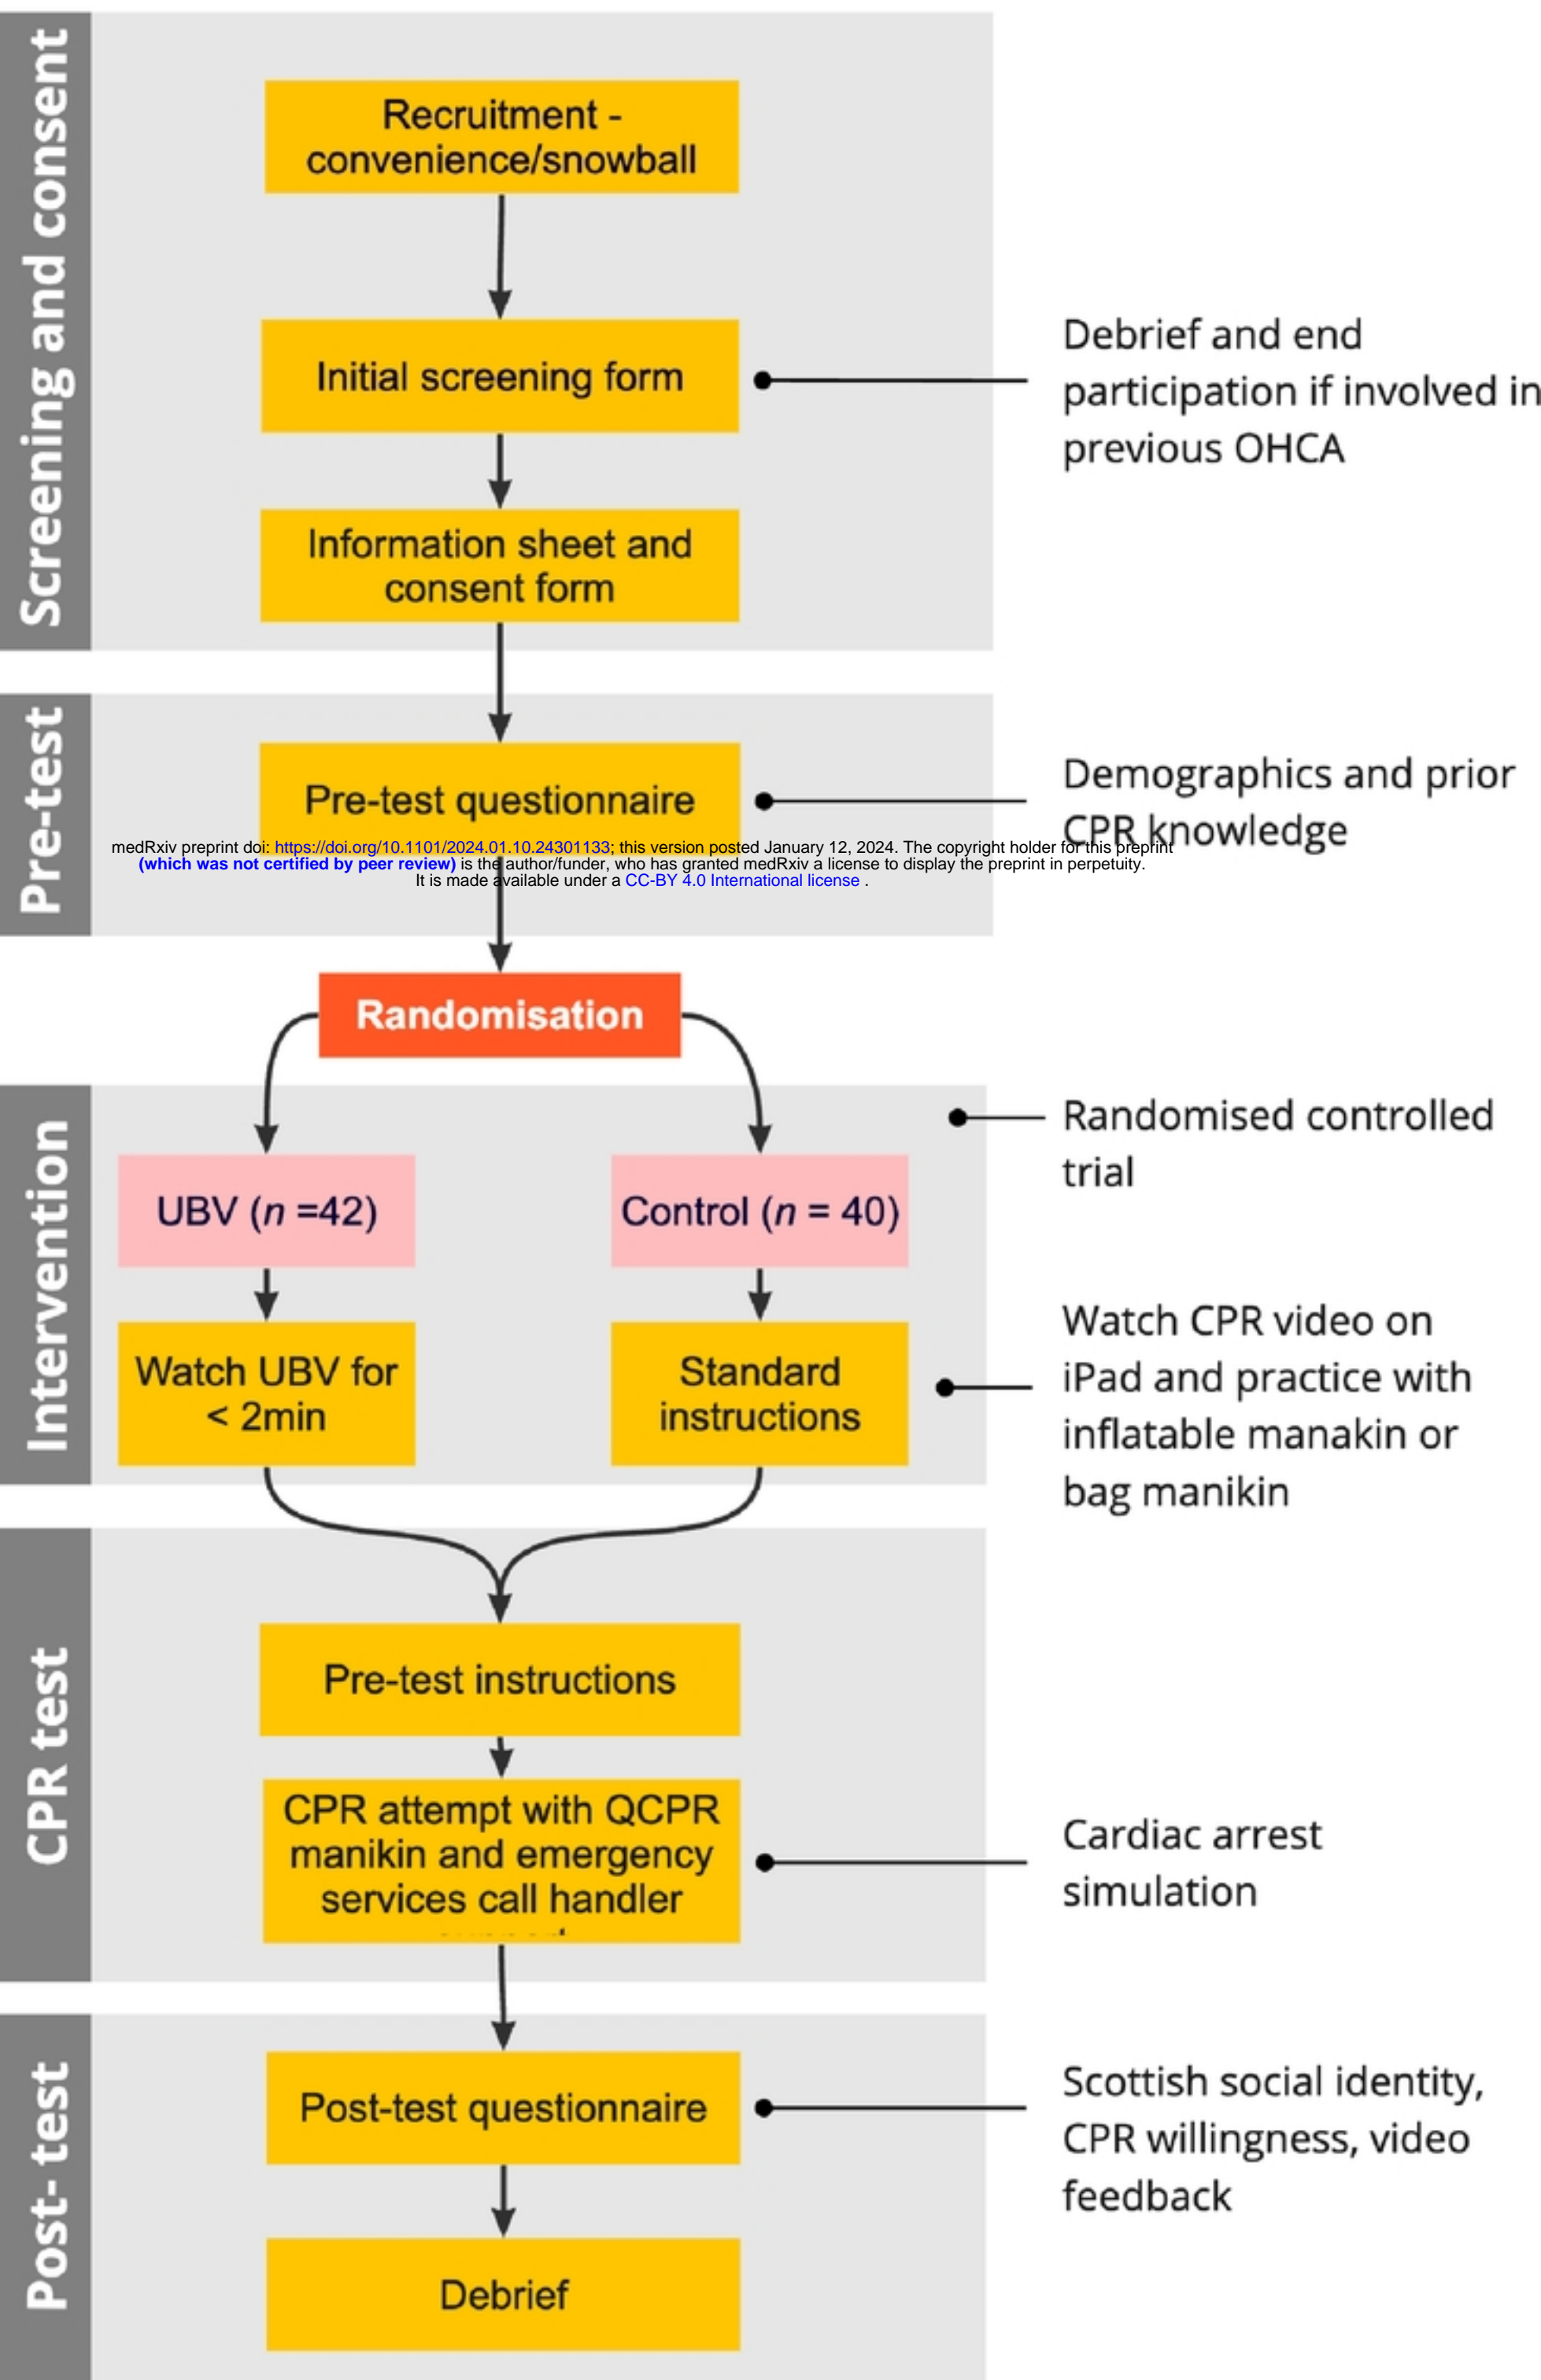

Figure 2
